# Supplementary material
Source: PubMed Central journal article supplement (PMC6996928)
Supplement: NIHMS1067610-supplement-Data_Supplement.pdf [file NIHMS1067610-supplement-Data_Supplement.pdf]

## Supplemental Information

### SDOH AND PEDIATRIC SCREENING

#### PubMed Search

1764 results

November 6, 2018

("social risk" OR "social determinant" OR "social determinants" OR "socioeconomic determinant"[tiab] OR "socioeconomic determinants"[tiab] OR "health determinant"[tiab] OR "socioeconomic factor"[tiab] OR "socioeconomic factors"[tiab] OR "health determinants"[tiab] OR "social determinates"[tiab] OR "adverse childhood event" OR "adverse childhood events" OR (seek [tiab] AND model\*[tiab]) OR (ace [tiab] AND childhood[tiab]))

AND (screen\*[tiab] OR mass screening[mesh] OR assess\*[tiab] OR interview\*[tiab] OR interviews as topic[mesh] OR Surveys and Questionnaires[mesh] OR checklist OR checklists OR survey\*[tiab] OR questionnaire\*[tiab] OR prevent\*[tiab])

AND (child[mesh] OR child health services[mesh] OR adolescent health [mesh] OR child health[mesh] OR child health services[mesh] OR pediatrics[mesh] OR child[mesh] OR Infan\*[tiab] OR newborn\*[tiab] OR new-born\*[tiab] OR perinat\*[tiab] OR neonat\*[tiab] OR baby[tiab] OR baby\*[tiab] OR babies[tiab] OR toddler\*[tiab] OR minors[tiab] OR minors\*[tiab] OR boy[tiab] OR boys[tiab] OR boyhood[tiab] OR girl\*[tiab] OR kid [tiab] OR kids[tiab] OR child[tiab] OR childs[tiab] OR children\*[tiab] OR schoolchild\*[tiab] OR schoolchild

[tiab] OR school child[tiab] OR school child\*[tiab] OR adolescen\*[tiab] OR juvenil\*[tiab] OR youth\*[tiab] OR teen\*[tiab] OR underage\*[tiab] OR pubescen\*[tiab] OR pediatrics[mesh] OR pediatric\*[tiab] OR paediatric\*[tiab] OR school[tiab] OR school\*[tiab] OR prematur\*[tiab] OR preterm\*[tiab] OR child welfare [mesh] OR pediatricians[mesh] OR pediatrician\*[tiab])

AND (pediatrician\*[tiab] OR clinician\*[tiab] OR "primary health care" OR "emergency department" OR "medical home" OR "primary care" OR visit OR visits OR inpatient\* OR professional\* OR clinic OR clinics OR "social services")

#### Cochrane Library

November 10, 2018

6 results

((("social risk" OR "social determinant" OR "social determinants" OR "socioeconomic determinants" OR "health determinant" OR "socioeconomic factor" OR "socioeconomic factors" OR "health determinants" OR "social determinates" OR "adverse childhood event" OR "adverse childhood events" OR (ace AND childhood)) AND (screen\* OR "mass screening" OR assess\* OR interview\* OR checklist OR checklists OR survey\* OR questionnaire\* OR prevent\*) AND ("adolescen\*OR Infan\*" OR newborn\* OR new-born\* OR perinat\* OR neonat\* OR baby OR baby\* OR babies OR toddler\* OR minors OR minors\* OR boy OR boys OR boyhood OR girl\* OR kid OR kids OR child OR childs OR

children\* OR schoolchild\* OR schoolchild OR "school child" OR "school child\*" OR adolescen\* OR juvenil\* OR youth\* OR teen\* OR underage\* OR pubescen\* OR pediatric\* OR paediatric\* OR school OR school\* OR prematur\* OR preterm\*) AND (pediatrician\* OR clinician\* OR "primary health care" OR "emergency department" OR "medical home" OR "primary care" OR visit OR visits OR inpatient\* OR professional\* OR clinic OR clinics OR "social services"))

#### Cumulative Index to Nursing and Allied Health Literature Search

November 10, 2018

1774 results

((("social risk" OR "social risks" OR "Social determinant" OR "social determinants" OR "socioeconomic determinant" OR "socioeconomic determinants" OR "health determinant" OR "health determinants" OR "socioeconomic factor" OR "socioeconomic factors" OR "social determinants" OR "adverse childhood" OR (ace AND childhood) OR (MH "social determinants of health")) AND ((MH "child+") OR (MH "child health services+") OR (MH "adolescent health+") OR (MH "adolescent health services") OR (MH "child health+") OR (MH "child health services+") OR (MH "pediatrics+") OR (MH "child+") OR TI Infan\* OR AB Infan\* OR TI newborn\* OR AB newborn\* OR TI new-born\* OR AB new-born\* OR TI perinat\* OR AB perinat\* OR TI neonat\* OR AB neonat\* OR TI baby OR AB baby OR

TI baby\* OR AB baby\* OR TI babies OR AB babies OR TI toddler\* OR AB toddler\* OR TI minors OR AB minors OR TI minors\* OR AB minors\* OR TI boy OR AB boy OR TI boys OR AB boys OR TI boyhood OR AB boyhood OR TI girl\* OR AB girl\* OR TI kid OR AB kid OR TI kids OR AB kids OR TI child OR AB child OR TI childs OR AB childs OR TI children\* OR AB children\* OR TI schoolchild\* OR AB schoolchild\* OR TI schoolchild OR AB schoolchild OR TI "school child" OR AB "school child" OR TI "school child\*" OR AB "school child\*" OR TI adolescen\* OR AB adolescen\* OR TI juvenil\* OR AB juvenil\* OR TI youth\* OR AB youth\* OR TI teen\* OR AB teen\* OR TI underage\* OR AB underage\* OR TI pubescen\* OR AB pubescen\* OR (MH "pediatrics+") OR TI pediatric\* OR AB pediatric\* OR TI paediatric\* OR AB paediatric\* OR TI school OR AB school OR TI school\* OR AB school\* OR TI prematur\* OR AB prematur\* OR TI preterm\* OR AB preterm\* OR (MH "child welfare+")) AND (((TI screen\* OR AB screen\* OR (MH "mass screening+") OR TI assessment\* OR AB assessment\* OR TI interview\* OR AB interview\* OR (MH "interviews as topic+") OR Surveys OR (MH "surveys") OR (MH "Questionnaires+") OR checklist OR checklists OR TI survey\* OR AB survey\* OR TI questionnaire\* OR AB questionnaire\* OR TI prevent\* OR AB prevent\*))) AND ((TI pediatrician\* OR AB pediatrician\* OR TI clinician\* OR AB clinician\* OR "primary health care" OR "emergency department" OR "medical home" OR "primary care" OR visit OR visits OR "social services" OR (MH "Pediatricians") OR (MH

"Primary Health Care") OR (MH "Emergency Service") OR (MH "Community Health Centers") OR (MH "Social Work Service"))

### Embase Search

November 10, 2018

1747 results

("social risk" OR "social determinant" OR "social determinants" OR "socioeconomic determinants" OR "health determinant" OR "socioeconomic factor" OR "socioeconomic factors" OR "health determinants" OR "social determinates" OR "adverse childhood event" OR "adverse childhood events" OR (ace AND childhood)) AND (screen\* OR "mass screening" OR "mass screening"/exp OR assess\* OR interview\* OR "interview"/exp OR "checklist"/exp OR checklist OR checklists OR survey\* OR "survey"/exp OR questionnaire\* OR prevent\*) AND ("child"/exp OR "adolescent"/exp OR "adolescen" OR "infan\*" OR newborn\* OR "new born\*" OR perinat\* OR neonat\* OR baby OR baby\* OR babies OR toddler\* OR minors OR minors\* OR boy OR boys OR boyhood OR girl\* OR kid OR kids OR child OR childs OR schoolchild\* OR schoolchild OR "school child" OR "school child\*" OR adolescen\* OR juvenil\* OR youth\* OR teen\* OR underage\* OR pubescen\* OR pediatric\* OR paediatric\* OR school OR school\* OR prematur\* OR preterm\*) AND ("pediatrician"/exp OR pediatrician\* OR clinician\* OR "primary health care"/exp OR "emergency department" OR "medical home" OR

"medical home"/exp OR "primary care" OR inpatient\* OR clinic OR clinics OR "social services")

### Web of Science

November 10, 2018

983 results

((("social risk" OR "social determinant" OR "social determinants" OR "socioeconomic determinants" OR "health determinant" OR "socioeconomic factor" OR "socioeconomic factors" OR "health determinants" OR "social determinates" OR "adverse childhood event" OR "adverse childhood events" OR (ace AND childhood)) AND (screen\* OR "mass screening" OR assess\* OR interview\* OR checklist OR checklists OR survey\* OR questionnaire\* OR prevent\*) AND ("adolescen\*OR Infan\*" OR newborn\* OR new-born\* OR perinat\* OR neonat\* OR baby OR baby\* OR babies OR toddler\* OR minors OR minors\* OR boy OR boys OR boyhood OR girl\* OR kid OR kids OR child OR childs OR children\* OR schoolchild\* OR schoolchild OR "school child" OR "school child\*" OR adolescen\* OR juvenil\* OR youth\* OR teen\* OR underage\* OR pubescen\* OR pediatric\* OR paediatric\* OR school OR school\* OR prematur\* OR preterm\*) AND (pediatrician\* OR clinician\* OR "primary health care" OR "emergency department" OR "medical home" OR "primary care" OR visit OR visits OR inpatient\* OR professional\* OR clinic OR clinics OR "social services"))
